# Supplementary material for: Beverage Intake and the Risk of Gestational Diabetes Mellitus: The SECOST
Source: MDPI journal article supplement (doi:10.3390/nu13072208), 2021-06-27
Supplement: s1 [file s1]

Supplementary Table S1. Energy and macronutrient intakes of women by cultured-milk drinks and fruit juice categories.

| Pre-pregnancy              | Cultured-milk drinks categories |                            |                              |                      |                | Fruit juice categories       |                               |                                |                      |                |                      |                |
|----------------------------|---------------------------------|----------------------------|------------------------------|----------------------|----------------|------------------------------|-------------------------------|--------------------------------|----------------------|----------------|----------------------|----------------|
|                            | T1                              | T2                         | T3                           | F <sup>a</sup>       | p-value        | T1                           | T2                            | T3                             | F <sup>b</sup>       | p-value        | F <sup>c</sup>       | p-value        |
|                            | (n=47)                          | (n= 73)                    | (n= 30)                      |                      |                | (n= 70)                      | (n= 97)                       | (n= 118)                       |                      |                |                      |                |
|                            | mean ± se                       |                            |                              |                      |                |                              |                               |                                |                      |                |                      |                |
| Energy intake (kcal/day)   | 2353 ± 147.64 <sup>a</sup>      | 2092 ± 69.37 <sup>b</sup>  | 2702 ± 287.47 <sup>a,b</sup> | 4.15                 | 0.02*          | 2011 ± 121.78 <sup>a</sup>   | 2176.90 ± 103.89 <sup>b</sup> | 2574.68 ± 94.11 <sup>a,b</sup> | 7.73                 | 0.01*          | 1.29                 | 0.28           |
| Carbohydrate (g/1000 kcal) | 139.88 ± 2.66                   | 142.25 ± 2.13              | 142.56 ± 3.29                | 2.94                 | 0.75           | 134.55 ± 2.43 <sup>a,b</sup> | 146.20 ± 2.07 <sup>a</sup>    | 145.58 ± 1.87 <sup>b</sup>     | 8.21                 | 0.001**        | 0.75                 | 0.56           |
| Sugar (g/1000 kcal)        | 40.69 ± 2.03                    | 41.26 ± 1.62               | 45.41 ± 2.51                 | 1.23                 | 0.29           | 33.07 ± 2.00 <sup>a,b</sup>  | 43.28 ± 1.71 <sup>a</sup>     | 46.62 ± 1.54 <sup>b</sup>      | 14.73                | 0.001**        | 2.62                 | 0.05           |
| Fat (g/1000 kcal)          | 22.57 ± 1.05                    | 23.56 ± 0.84               | 24.43 ± 1.30                 | 0.65                 | 0.53           | 26.52 ± 0.87 <sup>a,b</sup>  | 22.15 ± 0.74 <sup>a</sup>     | 22.64 ± 0.67 <sup>b</sup>      | 8.42                 | 0.001**        | 5.40                 | 0.001*         |
| Protein (g/1000 kcal)      | 33.81 ± 1.11 <sup>c</sup>       | 38.35 ± 0.89 <sup>c</sup>  | 35.44 ± 1.37                 | 5.27                 | 0.01*          | 38.75 ± 0.91 <sup>a,b</sup>  | 35.61 ± 0.78 <sup>a,c</sup>   | 32.54 ± 0.70 <sup>b,c</sup>    | 14.76                | 0.001**        | 1.13                 | 0.35           |
| <b>First trimester</b>     | <b>T1</b>                       | <b>T2</b>                  | <b>T3</b>                    | <b>F<sup>a</sup></b> | <b>p-value</b> | <b>T1</b>                    | <b>T2</b>                     | <b>T3</b>                      | <b>F<sup>b</sup></b> | <b>p-value</b> | <b>F<sup>c</sup></b> | <b>p-value</b> |
|                            | <b>(n=29)</b>                   | <b>(n= 49)</b>             | <b>(n= 31)</b>               |                      |                | <b>(n=63)</b>                | <b>(n= 77)</b>                | <b>(n= 117)</b>                |                      |                |                      |                |
| Energy intake (kcal/day)   | 2017 ± 142.63 <sup>a</sup>      | 2089 ± 129.16 <sup>b</sup> | 2603 ± 193.01 <sup>a,b</sup> | 3.85                 | 0.02*          | 1890 ± 117.33 <sup>a</sup>   | 2136.34 ± 106.53 <sup>b</sup> | 2439.08 ± 86.3 <sup>a,b</sup>  | 7.43                 | 0.001*         | 0.75                 | 0.56           |
| Carbohydrate (g/1000 kcal) | 140.92 ± 3.86                   | 143.39 ± 2.93              | 143.06 ± 3.72                | 0.18                 | 0.83           | 135.71 ± 2.44 <sup>a,b</sup> | 144.18 ± 2.21 <sup>a</sup>    | 143.19 ± 1.79 <sup>b</sup>     | 4.00                 | 0.02*          | 1.51                 | 0.21           |
| Sugar (g/1000 kcal)        | 43.20 ± 3.11                    | 47.01 ± 2.36               | 52.05 ± 2.99                 | 2.09                 | 0.13           | 41.35 ± 1.96 <sup>a</sup>    | 45.19 ± 1.78                  | 48.25 ± 1.44 <sup>a</sup>      | 4.05                 | 0.02*          | 1.46                 | 0.23           |
| Fat (g/1000 kcal)          | 32.10 ± 1.32                    | 30.02 ± 0.99               | 31.83 ± 1.27                 | 1.04                 | 0.36           | 33.16 ± 0.93                 | 31.15 ± 0.85                  | 31.31 ± 0.69                   | 1.60                 | 0.20           | 1.36                 | 0.26           |
| Protein (g/1000 kcal)      | 37.07 ± 1.41                    | 36.55 ± 1.07               | 36.42 ± 1.36                 | 0.06                 | 0.94           | 38.93 ± 0.96 <sup>a,b</sup>  | 35.61 ± 0.87 <sup>a</sup>     | 35.62 ± 0.71 <sup>b</sup>      | 4.51                 | 0.01           | 0.31                 | 0.87           |

Note. Cultured-milk drinks categories: Pre-pregnancy: T1: < 13.10 g, T2: 13.10 – 17.90 g, T3: > 17.90 g; Fruit juice categories: T1: < 35.72 g, T2: 35.72 – 71.43 g, T3: > 71.43 g; First trimester: T1: < 8.34 g, T2: 8.34 – 17.86 g, T3: > 17.86 g; Fruit juice categories: T1: < 35.72 g, T2: 35.72 – 71.43 g, T3: > 71.43 g).

F<sup>a</sup>= F between cultured-milk drink categories; F<sup>b</sup>= F between fruit juice categories; F<sup>c</sup>= F between cultured-milk drink categories and fruit juice categories Adjusted for age, education level and pre-pregnancy BMI. Similar superscript letters indicated statistically significant difference. \*p<0.05

Supplementary Table S2: Food groups based on dietary patterns between T3 of cultured-milk and T3 of fruit juice drinkers

|                 |                                             |                                                                                                                                                                                                                              |
|-----------------|---------------------------------------------|------------------------------------------------------------------------------------------------------------------------------------------------------------------------------------------------------------------------------|
| Pre-pregnancy   | T3 Cultured-milk drinks (> 17.90 g) (n= 30) | Bread, fish, eggs, chicken, green leafy vegetables, milk, cereal & other cereal products, rice, other vegetables, tubers, oil, <b>spreads, sweet foods, tea, coffee, sugar and creamer</b>                                   |
|                 | T3 Fruit juice (> 71.43 g) (n=118)          | Bread, fish, eggs, chicken, green leafy vegetables, milk, cereal & other cereal products, rice, other vegetables, tubers, oil, <b>nuts, seeds &amp; legumes, cruciferous vegetables</b>                                      |
| First trimester | T3 Cultured-milk drinks (> 17.86 g) (n= 31) | Bread, fish, eggs, chicken, green leafy vegetables, nuts, seeds & legumes, milk, dairy products, spreads, cereal & other cereal products, <b>rice, processed foods, sauces, sugar and creamer</b>                            |
|                 | T3 Fruit juice (> 71.43 g) (n= 117)         | Bread, fish, eggs, chicken, green leafy vegetables, nuts, seeds & legumes, milk, dairy products, spreads, cereal & other cereal products, <b>red meat, seafood, fruits, other vegetables, tubers, cruciferous vegetables</b> |

Supplementary Table S3. Energy and nutrient intakes of women by categories of energy derived from beverages.

| Energy derived from beverages |                                |                                     |                                 | F      | p-value  |
|-------------------------------|--------------------------------|-------------------------------------|---------------------------------|--------|----------|
| Pre-pregnancy                 | T1 (< 154 kcal)<br>(n= 151)    | T2 (154 – 297 kcal/day)<br>(n= 151) | T3 (> 297 kcal/day)<br>(n= 150) |        |          |
|                               | mean ± se                      |                                     |                                 |        |          |
| Energy intake (kcal/day)      | 1821 ± 63.63                   | 2047 ± 52.26                        | 2611 ± 101.46                   | 29.10  | 0.001*,a |
| Carbohydrate (g/day)          | 251.49 ± 9.94                  | 293.32 ± 8.47                       | 366.00 ± 14.14                  | 27.19  | 0.001*,a |
| Sugar (g/day)                 | 57.99 ± 2.90                   | 82.38 ± 3.12                        | 110.85 ± 4.55                   | 54.08  | 0.001*,a |
| Fat (g/day)                   | 41.60 ± 1.72                   | 49.46 ± 2.07                        | 60.10 ± 2.71                    | 17.67  | 0.001*,a |
| Protein (g/day)               | 68.61 ± 2.64                   | 74.70 ± 2.50                        | 88.79 ± 3.94                    | 11.18  | 0.001*,a |
| First trimester               | T1 (< 215 kcal/day)<br>(n=150) | T2 (215 – 395 kcal/day)<br>(n= 152) | T3 (> 395 kcal/day)<br>(n= 150) |        |          |
|                               | mean ± se                      |                                     |                                 |        |          |
| Energy intake (kcal/day)      | 1577 ± 52.76                   | 1946 ± 50.77                        | 2578 ± 89.26                    | 57.53  | 0.001*,a |
| Carbohydrate (g/day)          | 224.45 ± 8.34                  | 272.17 ± 7.92                       | 356.63 ± 12.20                  | 43.80  | 0.001*,a |
| Sugar (g/day)                 | 56.71 ± 3.55                   | 80.26 ± 2.53                        | 130.58 ± 4.30                   | 114.05 | 0.001*,a |
| Fat (g/day)                   | 49.17 ± 2.09                   | 63.51 ± 2.24                        | 83.56 ± 3.08                    | 47.27  | 0.001*,a |
| Protein (g/day)               | 57.49 ± 1.59                   | 69.69 ± 2.36                        | 99.13 ± 4.09                    | 50.44  | 0.001*,a |
| Second trimester              | T1 (< 239 kcal/day)<br>(n=151) | T2 (239 – 406 kcal/day)<br>(n= 151) | T3 (> 406 kcal/day)<br>(n= 150) |        |          |
|                               | mean ± se                      |                                     |                                 |        |          |
| Energy intake (kcal/day)      | 1771 ± 46.34                   | 2092 ± 53.74                        | 2655 ± 91.83                    | 44.76  | 0.001*,a |
| Carbohydrate (g/day)          | 252.66 ± 7.01                  | 290.27 ± 8.45                       | 370.14 ± 13.73                  | 34.99  | 0.001*,a |
| Sugar (g/day)                 | 56.86 ± 2.03                   | 81.52 ± 2.63                        | 125.33 ± 5.65                   | 84.27  | 0.001*,a |
| Fat (g/day)                   | 56.40 ± 2.07                   | 71.62 ± 2.37                        | 88.67 ± 3.28                    | 37.89  | 0.001*,a |

|                 |              |              |              |       |                      |
|-----------------|--------------|--------------|--------------|-------|----------------------|
| Protein (g/day) | 61.15 ± 2.04 | 70.11 ± 1.84 | 93.99 ± 1.64 | 42.08 | 0.001*, <sup>a</sup> |
|-----------------|--------------|--------------|--------------|-------|----------------------|

Adjusted for age, education level and pre-pregnancy BMI

<sup>a</sup> Significant difference between each other, which all had statistical significance.

\*p<0.05

## References

1. Malik, V.S.; Schulze, M.B.; Hu, F.B. Intake of sugar-sweetened beverages and weight gain: A systematic review. *Am. J. Clin. Nutr.* **2006**, *84*, 274–288, doi:10.1093/ajcn/84.1.274.
2. Imamura, F.; O'Connor, L.; Ye, Z.; Mursu, J.; Hayashino, Y.; Bhupathiraju, S.N.; Forouhi, N.G. Consumption of sugar sweetened beverages, artificially sweetened beverages, and fruit juice and incidence of type 2 diabetes: Systematic review, meta-analysis, and estimation of population attributable fraction. *Br. J. Sports Med.* **2016**, *351*, h3576, doi:10.1136/bjsports-2016-h3576rep.
3. U.S. Department of Health and Human Services and U.S. Department of Agriculture Dietary Guidelines for Americans 2015 – 2020.
4. Nielsen, S.J.; Popkin, B.M. Changes in beverage intake between 1977 and 2001. *Am. J. Prev. Med.* **2004**, *27*, 205–210, doi:10.1016/j.amepre.2004.05.005.
5. Xi, B.; Huang, Y.; Reilly, K.H.; Li, S.; Zheng, R.; Barrio-Lopez, M.T.; Martinez-Gonzalez, M.A.; Zhou, D. Sugar-sweetened beverages and risk of hypertension and CVD: A dose-response meta-analysis. *Br. J. Nutr.* **2015**, *113*, 709–717, doi:10.1017/S0007114514004383.
6. Singh, G.M.; Micha, R.; Khatibzadeh, S.; Lim, S.; Ezzati, M.; Mozaffarian, D. Estimated global, regional, and national disease burdens related to sugar-sweetened beverage consumption in 2010. *Circulation* **2015**, *132*, 639–666, doi:10.1161/CIRCULATIONAHA.114.010636.
7. Keller, A.; Heitmann, B.L.; Olsen, N. Sugar-sweetened beverages, vascular risk

- factors and events: A systematic literature review. *Public Health Nutr.* **2015**, *18*, 1145–1154, doi:10.1017/S1368980014002122.
8. Woodward-Lopez, G.; Kao, J.; Ritchie, L. To what extent have sweetened beverages contributed to the obesity epidemic? *Public Health Nutr.* **2011**, *14*, 499–509, doi:10.1017/S1368980010002375.
  9. Liu, S.; Manson, J.A.E.; Buring, J.E.; Stampfer, M.J.; Willett, W.C.; Ridker, P.M. Relation between a diet with a high glycemic load and plasma concentrations of high-sensitivity C-reactive protein in middle-aged women. *Am. J. Clin. Nutr.* **2002**, *75*, 492–498, doi:10.1093/ajcn/75.3.492.
  10. Lundeen, E.A.; Park, S.; Woo Baidal, J.A.; Sharma, A.J.; Blanck, H.M. Sugar-Sweetened Beverage Intake Among Pregnant and Non-pregnant Women of Reproductive Age. *Matern. Child Health J.* **2020**, *24*, 709–717, doi:10.1007/s10995-020-02918-2.
  11. Gamba, R.J.; Leung, C.W.; Petito, L.; Abrams, B.; Laraia, B.A. Sugar sweetened beverage consumption during pregnancy is associated with lower diet quality and greater total energy intake. *PLoS One* **2019**, *14*, 1–13, doi:10.1371/journal.pone.0215686.
  12. Petherick, E.S.; Goran, M.I.; Wright, J. Relationship between artificially sweetened and sugar-sweetened cola beverage consumption during pregnancy and preterm delivery in a multi-ethnic cohort: analysis of the Born in Bradford cohort study. *Eur. J. Clin. Nutr.* **2014**, *68*, 404–407, doi:10.1038/ejcn.2013.267.

13. Cohen, J.F.W.; Rifas-Shiman, S.L.; Young, J.; Oken, E. Associations of Prenatal and Child Sugar Intake With Child Cognition. *Am. J. Prev. Med.* **2018**, *54*, 727–735, doi:10.1016/j.amepre.2018.02.020.
14. Gillman, M.W.; Rifas-Shiman, S.L.; Fernandez-Barres, S.; Kleinman, K.; Taveras, E.M.; Oken, E. Beverage intake during pregnancy and childhood adiposity. *Pediatrics* **2017**, *140*, doi:10.1542/peds.2017-0031.
15. Wright, L.S.; Rifas-Shiman, S.L.; Oken, E.; Litonjua, A.A.; Gold, D.R. Prenatal and early life fructose, fructose-containing beverages, and midchildhood asthma. *Ann. Am. Thorac. Soc.* **2018**, *15*, 217–224, doi:10.1513/AnnalsATS.201707-530OC.
16. Jen, V.; Erler, N.S.; Tielemans, M.J.; Braun, K.V.E.; Jaddoe, V.W.V.; Franco, O.H.; Voortman, T. Mothers' intake of sugar-containing beverages during pregnancy and body composition of their children during childhood: The Generation R Study. *Am. J. Clin. Nutr.* **2017**, *105*, 834–841, doi:10.3945/ajcn.116.147934.
17. Chen, L.; Hu, F.B.; Yeung, E.; Willett, W.; Zhang, C. Prospective study of pre-gravid sugar-sweetened beverage consumption and the risk of gestational diabetes mellitus. *Diabetes Care* **2009**, *32*, 2236–2241, doi:10.2337/dc09-0866.
18. Ahmad, M.H. Food Consumption Patterns: Findings from the Malaysian Adults Nutrition Survey (MANS) 2014. In Proceedings of the Medical Journal of Malaysia; 2015; Vol. 70, p. 16.
19. Norimah, A.K.; Safiah, M.; Jamal, K.; Haslinda, S.; Zuhaida, H.; Rohida, S.;

- Fatimah, S.; Norazlin, S.; Poh, B.K.; Kandiah, M.; et al. Food Consumption Patterns: Findings from the Malaysian Adult Nutrition Survey (MANS). *Malays. J. Nutr.* **2008**, *14*, 25–39.
20. Yong, H.Y.; Mohd Shariff, Z.; Rejali, Z.; Mohd Yusof, B.N.; Yasmin, F.; Palaniveloo, L. Seremban Cohort Study (SECOST): a prospective study of determinants and pregnancy outcomes of maternal glycaemia in Malaysia. *BMJ Open* **2018**, *8*, e018321, doi:10.1136/bmjopen-2017-018321.
  21. Ministry of Health Malaysia *Perinatal Care Manual 3rd Edition*; Division of Family Health Development, MOH: Putrajaya, Malaysia, 2013;
  22. Ministry of Health Malaysia *The Malaysian Adults Nutrition Survey (MANS)- Findings Report 2003*; Ministry of Health Malaysia, Malaysia: Nutrition Section Family Health Development Division, Putrajaya, 2007;
  23. WHO *Physical status: The Use and Interpretation of Anthropometry. Report of a WHO Expert Committee.*; World Health Organization, Ed.; WHO Technical Report Series No. 854.: Geneva, 1995;
  24. IOM *Weight Gain During Pregnancy: Reexamining the Guidelines*; Rasmussen, K.M., Yaktine, A.L., Eds.; The National Academies Press: Washington (DC), 2009; ISBN 9780309131131.
  25. Drouin-Chartier, J.P.; Zheng, Y.; Li, Y.; Malik, V.; Pan, A.; Bhupathiraju, S.N.; Tobias, D.K.; Manson, J.A.E.; Willett, W.C.; Hu, F.B. Changes in consumption of sugary beverages and artificially sweetened beverages and subsequent risk of type 2 diabetes: Results from three large prospective U.S. Cohorts of women



- and men. *Diabetes Care* **2019**, dc190734, doi:10.2337/dc19-0734.
26. Mathur, K.; Agrawal, R.K.; Nagpure, S.; Deshpande, D. Effect of artificial sweeteners on insulin resistance among type-2 diabetes mellitus patients. *J. Fam. Med. Prim. care* **2020**, *9*, 69–71, doi:10.4103/jfmprc.jfmprc\_329\_19.
  27. Chen, L.; Hu, F.B.; Yeung, E.; Tobias, D.K.; Willett, W.C.; Zhang, C. Prepregnancy consumption of fruits and fruit juices and the risk of gestational diabetes mellitus: a prospective cohort study. *Diabetes Care* **2012**, *35*, 1079–1082, doi:10.2337/dc11-2105.
  28. Savaiano, D.A.; Hutkins, R.W. Yogurt, cultured fermented milk, and health: a systematic review. *Nutr. Rev.* **2020**, *0*, 1–16, doi:10.1093/nutrit/nuaa013.
  29. Asemi, Z.; Samimi, M.; Tabasi, Z.; Talebian, P.; Azarbad, Z.; Hydarzadeh, Z.; Esmailzadeh, A. Effect of daily consumption of probiotic yoghurt on insulin resistance in pregnant women: A randomized controlled trial. *Eur. J. Clin. Nutr.* **2013**, *67*, 71–74.
  30. Pellonperä, O.; Morkkala, K.; Houttu, N.; Vahlberg, T.; Koivuniemi, E.; Tertti, K.; Rönnemaa, T.; Laitinen, K. Efficacy of fish oil and/or probiotic intervention on the incidence of gestational diabetes mellitus in an at-risk group of overweight and obese women: A randomized, placebo-controlled, double-blind clinical trial. *Diabetes Care* **2019**, *42*, 1009–1017, doi:10.2337/dc18-2591.
  31. Bakker, R.; Steegers, E.A.P.; Obradov, A.; Raat, H.; Hofman, A.; Jaddoe, V.W.V. Maternal caffeine intake from coffee and tea, fetal growth, and the risks of adverse birth outcomes: The Generation R Study. *Am. J. Clin. Nutr.*

- 2010, 91, 1691–1698, doi:10.3945/ajcn.2009.28792.
32. Chen, L.W.; Fitzgerald, R.; Murrin, C.M.; Mehegan, J.; Kelleher, C.C.; Phillips, C.M. Associations of maternal caffeine intake with birth outcomes: Results from the Lifeways Cross Generation Cohort Study. *Am. J. Clin. Nutr.* **2018**, *108*, 1301–1308, doi:10.1093/ajcn/nqy219.
33. Van Der Hoeven, T.; Browne, J.L.; Uiterwaal, C.S.P.M.; Van Der Ent, C.K.; Grobbee, D.E.; Dalmeijer, G.W. Antenatal coffee and tea consumption and the effect on birth outcome and hypertensive pregnancy disorders. *PLoS One* **2017**, *12*, e0177619, doi:10.1371/journal.pone.0177619.
34. Sengpiel, V.; Elind, E.; Bacelis, J.; Nilsson, S.; Grove, J.; Myhre, R.; Haugen, M.; Meltzer, H.M.; Alexander, J.; Jacobsson, B.; et al. Maternal caffeine intake during pregnancy is associated with birth weight but not with gestational length: Results from a large prospective observational cohort study. *BMC Med.* **2013**, *11*, 42, doi:10.1186/1741-7015-11-42.
35. Skreden, M.; Bere, E.; Sagedal, L.R.; Vistad, I.; Overby, N.C. Changes in beverage consumption from pre-pregnancy to early pregnancy in the Norwegian Fit for Delivery study. *Public Health Nutr.* **2015**, *18*, 1187–1196, doi:10.1017/S136898001400189X.
36. Chen, L.W.; Low, Y.L.; Fok, D.; Han, W.M.; Chong, Y.S.; Gluckman, P.; Godfrey, K.; Kwek, K.; Saw, S.M.; Soh, S.E.; et al. Dietary changes during pregnancy and the postpartum period in Singaporean Chinese, Malay and Indian women: The GUSTO birth cohort study. *Public Health Nutr.* **2014**, *17*,

- 1939–1948, doi:10.1017/S1368980013001730.
37. Reis, C.E.G.; Dórea, J.G.; da Costa, T.H.M. Effects of coffee consumption on glucose metabolism: A systematic review of clinical trials. *J. Tradit. Complement. Med.* **2019**, *9*, 184–191, doi:10.1016/j.jtcme.2018.01.001.
38. Shi, X.; Xue, W.; Liang, S.; Zhao, J.; Zhang, X. Acute caffeine ingestion reduces insulin sensitivity in healthy subjects: a systematic review and meta-analysis. *Nutr. J.* **2016**, *15*, 103, doi:10.1186/s12937-016-0220-7.
39. Tunnicliffe, J.M.; Shearer, J. Coffee, glucose homeostasis, and insulin resistance: Physiological mechanisms and mediators. *Appl. Physiol. Nutr. Metab.* **2008**, *33*, 1290–300, doi:10.1139/H08-123.
40. Hinkle, S.N.; Laughon, S.K.; Catov, J.M.; Olsen, J.; Bech, B.H. First trimester coffee and tea intake and risk of gestational diabetes mellitus: A study within a national birth cohort. *BJOG An Int. J. Obstet. Gynaecol.* **2015**, *122*, 420–428, doi:10.1111/1471-0528.12930.
41. Adeney, K.L.; Williams, M.A.; Schiff, M.A.; Qiu, C.; Sorensen, T.K. Coffee consumption and the risk of gestational diabetes mellitus. *Acta Obstet. Gynecol. Scand.* **2007**, *86*, 161–166, doi:10.1080/00016340600994992.
42. Ministry of Health Malaysia *Malaysian Adult Nutrition Survey 2003. Habitual food intake of adults aged 18 to 59 years.*; Nutrition Section, Family Health Development Division, Ministry of Health, Malaysia: Putrajaya, Malaysia, 2008;
